# Supplementary material
Source: PubMed Central journal article supplement (PMC3495605)
Supplement: NIHMS414961-supplement-supplement.pdf [file NIHMS414961-supplement-supplement.pdf]

# Supplement to “Perturbation and Scaled Cook’s Distances”

Hongtu Zhu and Joseph G. Ibrahim

## Abstract

We investigate two theoretical examples on generalized linear models and linear mixed models to illustrate the calculation of scaled Cook’s distances. We also include additional results obtained from the Monte Carlo simulation studies and real data analysis.

## 1 Theoretical Examples

In the following, we will derive the scaled Cook’s distances for generalized linear models.

**Example S1.** We consider Cook’s distance in generalized linear models (?) as follows.

Suppose that the components of  $\mathbf{y} = (y_1, \dots, y_n)^T$  given  $\mathbf{X} = (\mathbf{x}_1, \dots, \mathbf{x}_n)^T$  are mutually independent, and the conditional density of  $y_i$  given  $\mathbf{x}_i$  is given by

$$p(y_i|\mathbf{x}_i, \boldsymbol{\beta}, \tau) = \exp \{ a(\tau)^{-1} [y_i \eta_i - b(\eta_i)] + c(y_i, \tau) \}, \quad (1)$$

where  $a(\cdot)$ ,  $b(\cdot)$  and  $c(\cdot, \cdot)$  are known functions,  $\eta_i = \eta(\mu_i)$  and  $\mu_i = \mu_i(\boldsymbol{\beta}) = g(\mathbf{x}_i^T \boldsymbol{\beta})$ , in which  $g(\cdot)$  is a known monotonic function and twice continuously differentiable and  $\boldsymbol{\beta} = (\beta_1, \dots, \beta_p)^T$ . Throughout this example, the parameter of interest is  $\boldsymbol{\beta}$  and  $\tau$  is a nuisance parameter and is fixed at  $\hat{\tau}$ . We define

$$V(\boldsymbol{\beta}) = \text{diag}(\ddot{b}(\eta(\mu_1(\boldsymbol{\beta}))), \dots, \ddot{b}(\eta(\mu_n(\boldsymbol{\beta})))) \quad \text{and} \quad D(\boldsymbol{\beta})^T = (\partial_{\beta} \mu_1(\boldsymbol{\beta}), \dots, \partial_{\beta} \mu_n(\boldsymbol{\beta})),$$

where  $\partial_{\beta}$  denotes differentiation with respect to  $\boldsymbol{\beta}$  and  $\ddot{b}(\eta)$  denotes the second derivative of  $b(\eta)$  with respect to  $\eta$ .

We first compute the degree of the perturbation for deleting each  $(y_i, \mathbf{x}_i)$  for the case of fixed covariates. Since  $\mathcal{M}$  assumes (??), it follows from the Taylor's series expansion that

$$\begin{aligned} \mathcal{P}(\{i\}|\mathcal{M}) &= E_{\theta}\{g(\mathbf{x}_i^T\boldsymbol{\beta})[a(\tau)^{-1}\eta_i(\boldsymbol{\beta}) - a(\tau_*)^{-1}\eta_i(\boldsymbol{\beta}_*)]\} + E_{\theta}E_{y_i,\theta}[c(y_i, \tau) - c(y_i, \tau_*)] \\ &\approx \frac{1}{2}\ddot{b}(\eta(\mu_n(\boldsymbol{\beta}_*)))\partial_{\beta}\eta(\mu_i(\boldsymbol{\beta}_*))^T[\sum_{i=1}^n \ddot{b}(\eta(\mu_n(\boldsymbol{\beta}_*)))\partial_{\beta}\eta(\mu_i(\boldsymbol{\beta}_*))^{\otimes 2}]^{-1}\partial_{\beta}\eta(\mu_i(\boldsymbol{\beta}_*)) \\ &+ \frac{1}{2}K_i(\boldsymbol{\theta}_*)[\sum_{i=1}^n K_i(\boldsymbol{\theta}_*)]^{-1}, \end{aligned} \quad (2)$$

where  $E_{\theta}$  is taken with respect to  $p(\boldsymbol{\theta}|\boldsymbol{\theta}_*, G_{n\theta}^{-1})$  and  $E_{y_i,\theta}$  is taken with respect to  $p(y_i|\mathbf{x}_i, \boldsymbol{\beta}, \tau)$  in (??). Moreover,  $K_i(\boldsymbol{\theta})$  is defined as

$$[2\dot{a}(\tau)a(\tau)^{-1} - \ddot{a}(\tau)\dot{a}(\tau)^{-1}]E_{y_i,\theta}[\dot{c}(y_i, \tau)] + E_{y_i,\theta}[\ddot{c}(y_i, \tau)].$$

If we are only interested in  $\boldsymbol{\beta}$  and treat  $\tau$  as a nuisance parameter,  $0.5K_i(\boldsymbol{\theta}_*)[\sum_{i=1}^n K_i(\boldsymbol{\theta}_*)]^{-1}$  can be dropped from  $\mathcal{P}(\{i\}|\mathcal{M})$  in (??).

Following the derivations in (??), we can show that Cook's distance for deleting subset  $I$  with  $\text{size}(I) = n(I)$  can be approximated by

$$\widetilde{\text{CD}}(I) = \frac{1}{a(\hat{\tau})}\hat{\mathbf{e}}^T\hat{V}^{-1/2}U_I(\mathbf{I}_{n(I)} - \hat{H}_I)^{-1}\hat{H}_I(\mathbf{I}_{n(I)} - \hat{H}_I)^{-1}U_I^T\hat{V}^{-1/2}\hat{\mathbf{e}}, \quad (3)$$

where  $\hat{D} = D(\hat{\boldsymbol{\beta}})$ ,  $\hat{V} = V(\hat{\boldsymbol{\beta}})$ ,  $\hat{\mathbf{e}}$  is an  $n \times 1$  vector containing all  $\hat{e}_i = y_i - \mu_i(\hat{\boldsymbol{\beta}})$ , and  $\hat{H}_I = \tilde{\mathbf{X}}_I(\tilde{\mathbf{X}}^T\tilde{\mathbf{X}})^{-1}\tilde{\mathbf{X}}_I^T$ . In addition,  $\tilde{\mathbf{X}} = \hat{V}^{-1/2}\hat{D}$  and  $\tilde{\mathbf{X}}_I$  is an  $n(I) \times p$  matrix containing the  $i$ -th row of  $\tilde{\mathbf{X}}$  for all  $i \in I$ , and  $U_I = (\mathbf{u}_{i_1}, \dots, \mathbf{u}_{i_{n(I)}})$ , in which  $i_k \in I$  and  $\mathbf{u}_{i_k}$  is an  $n \times 1$  vector with  $i_k$ -th element equal to 1 and zero otherwise.

For generalized linear models, we can calculate the scaled Cook's distance and thus obtain the following theorem.

**Theorem S1.** *Suppose that Assumptions A2-A5 in the appendix hold for the generalized linear model (??). We have the following results:*

(a)  $\widetilde{CD}(I) = CD_*(I)[1 + o_p(1)]$ , and  $CD_*(I) = \mathbf{e}_*^T \mathbf{W}_* \mathbf{e}_* / [a(\tau_*)]$ , where  $\mathbf{W}_* = (w_{ij*})$  is an  $n \times n$  matrix and given by

$$\mathbf{W}_* = V_*^{-1/2}(\mathbf{I}_n - H_*)U_I(\mathbf{I}_{n(I)} - H_{*,I})^{-1}H_{*,I}(\mathbf{I}_{n(I)} - H_{*,I})^{-1}U_I^T(\mathbf{I}_n - H_*)V_*^{-1/2}, \quad (4)$$

in which  $\mathbf{e}_* = (e_{1*}, \dots, e_{n*})^T$  and  $e_{i*} = y_i - \mu_i(\boldsymbol{\beta}_*)$ ,  $D_* = D(\boldsymbol{\beta}_*)$ ,  $V_* = V(\boldsymbol{\beta}_*)$ ,  $H_* = \mathbf{X}_*(\mathbf{X}_*^T \mathbf{X}_*)^{-1} \mathbf{X}_*^T$ ,  $\mathbf{X}_* = V_*^{-1/2} D_*$ ,  $H_{*,I} = U_I^T H_* U_I$  and  $\boldsymbol{\beta}_*$  is the true value of  $\boldsymbol{\beta}$ .

(b) Let  $\lambda_{I,1} \geq \dots \lambda_{I,n(I)} \geq 0$  be the ordered eigenvalues of  $H_{*,I}$ . We have

$$\begin{aligned} E[CD_*(I)|\mathcal{M}] &= E\{tr[(\mathbf{I}_{n(I)} - H_{*,I})^{-1}]|\mathcal{M}\} - n(I) = \sum_{j=1}^{n(I)} E[(1 - \lambda_{I,j})^{-1}|\mathcal{M}] - n(I), \\ \text{Var}[CD_*(I)|\mathcal{M}] &= a(\tau_*) \sum_{i=1}^n w_{ii*} b^{(4)}(\eta_{i*}) + \text{Var}\{tr[(\mathbf{I}_{n(I)} - H_{*,I})^{-1}]|\mathcal{M}\} \\ &\quad + 2E\{tr[(\mathbf{I}_{n(I)} - H_{*,I})^{-2}]|\mathcal{M}\} - 4E\{tr[(\mathbf{I}_{n(I)} - H_{*,I})^{-1}]|\mathcal{M}\} + 2n(I), \end{aligned} \quad (5)$$

where  $\eta_{i*} = \eta(\mu_i(\boldsymbol{\beta}_*))$  and  $b^{(4)}(\eta_{i*})$  denotes the fourth derivative of  $b(\eta)$  with respect to  $\eta$ . If  $n(I) \geq p$ , then  $\sum_{j=1}^{n(I)} E[(1 - \lambda_{I,j})^{-1}|\mathcal{M}] - n(I) = \sum_{j=1}^p E[(1 - \lambda_{I,j})^{-1}|\mathcal{M}] - p$ .

(c) If the  $\mathbf{x}_i$  are independently and identically distributed and

$0 < E[\|\ddot{b}(\eta(g(\mathbf{x}^T \boldsymbol{\beta})))^{-1/2} \partial_{\beta} g(\mathbf{x}^T \boldsymbol{\beta})\|_2^{1+s}] < \infty$  for an arbitrary  $s > 0$ , then  $\lambda_{I,j} - n(I)/n = o(1)$  for  $j \leq p$  as  $n(I) \rightarrow \infty$  and  $n(I)/n \rightarrow \gamma \in [0, 1)$ .

*Proof of Theorem S1.* (a). Let  $\mu(\boldsymbol{\beta}) = (\mu_1(\boldsymbol{\beta}), \dots, \mu_n(\boldsymbol{\beta}))^T$ . If the model  $\mathcal{M}$  is true, then  $(\hat{\boldsymbol{\beta}} - \boldsymbol{\beta}_*) = (D_*^T V_*^{-1} D_*)^{-1} D_*^T V_*^{-1} \mathbf{e}_* + o_p(n^{-1/2})$ . Thus, under Assumptions A2-A5, we have

$$\begin{aligned} U_I^T V_*^{-1/2} \hat{\mathbf{e}} &= U_I^T V_*^{-1/2} [\mathbf{y} - \mu(\boldsymbol{\beta}_*) + \mu(\boldsymbol{\beta}_*) - \mu(\hat{\boldsymbol{\beta}})] \\ &= U_I^T V_*^{-1/2} [\mathbf{e}_* - D_*(\hat{\boldsymbol{\beta}} - \boldsymbol{\beta}_*)] = U_I^T (\mathbf{I}_n - H_*) V_*^{-1/2} \mathbf{e}_* [1 + o_p(1)], \end{aligned}$$

where  $\mathbf{e}_* = \mathbf{y} - \mu(\boldsymbol{\beta}_*)$ . This yields Theorem S1 (a).

(b). We consider two scenarios including both random and fixed covariates. For the case of random covariate, the current model  $\mathcal{M}$  includes the specifications of the distribution on  $\mathbf{X}$  and the conditional distribution of  $\mathbf{y}$  given  $\mathbf{X}$ , which are, respectively,

represented as  $\mathcal{M}_{\mathbf{X}}$  and  $\mathcal{M}_{\mathbf{y}|\mathbf{X}}$ . Since  $E[\mathbf{e}_*^{\otimes 2}|\mathcal{M}] = a(\tau_*)E[V_*|\mathcal{M}_{\mathbf{X}}]$ , we have

$$E[\text{CD}_*(I)|\mathcal{M}] = p^{-1}E\{\text{tr}[H_{*,I}(\mathbf{I}_{n(I)} - H_{*,I})^{-1}|\mathcal{M}]\} = p^{-1}E\{\text{tr}[(\mathbf{I}_{n(I)} - H_{*,I})^{-1}|\mathcal{M}]\} - p^{-1}n(I),$$

where  $E[\cdot|\mathcal{M}_{\mathbf{X}}]$  denotes the expectation taken with respect to the distribution of  $\mathbf{X}$ .

Recall that  $E[e_{i*}|\mathcal{M}] = 0$ ,  $E[e_{i*}^2|\mathcal{M}] = a(\tau_*)E[\ddot{b}(\eta_{i*})|\mathcal{M}_{\mathbf{X}}]$ , and

$$E[e_{i*}^4|\mathcal{M}] = 3a(\tau_*)^2E[\ddot{b}(\eta_{i*})^2|\mathcal{M}_{\mathbf{X}}] + a(\tau_*)^3E[b^{(4)}(\eta_{i*})|\mathcal{M}_{\mathbf{X}}].$$

With some algebraic calculation, it can be shown that

$$\begin{aligned} E\left[\sum_{i,j=1}^n w_{ij*}e_{i*}e_{j*}|\mathcal{M}\right] &= a(\tau_*)\sum_{i=1}^n E[w_{ii*}\ddot{b}(\eta_{i*})|\mathcal{M}_{\mathbf{X}}], \\ E\left\{\left[\sum_{i,j=1}^n w_{ij*}e_{i*}e_{j*}\right]^2|\mathcal{M}\right\} &= a(\tau_*)^3\sum_{i=1}^n E[w_{ii*}^2b^{(4)}(\eta_{i*})|\mathcal{M}_{\mathbf{X}}] \\ &\quad + a(\tau_*)^2E\left\{\left[\sum_{i=1}^n w_{ii*}\ddot{b}(\eta_{i*})\right]^2 + 2\sum_{i,j=1}^n w_{ij*}^2\ddot{b}(\eta_{i*})\ddot{b}(\eta_{j*})\right\}|\mathcal{M}_{\mathbf{X}}\right\}, \\ \text{Var}\left\{\left[\sum_{i,j=1}^n w_{ij*}e_{i*}e_{j*}\right]^2|\mathcal{M}\right\} &= a(\tau_*)^3\sum_{i=1}^n E[w_{ii*}^2b^{(4)}(\eta_{i*})|\mathcal{M}_{\mathbf{X}}] + a(\tau_*)^2\text{Var}\left[\sum_{i=1}^n w_{ii*}\ddot{b}(\eta_{i*})|\mathcal{M}_{\mathbf{X}}\right] \\ &\quad + 2a(\tau_*)^2E\left[\sum_{i,j=1}^n w_{ij*}^2\ddot{b}(\eta_{i*})\ddot{b}(\eta_{j*})|\mathcal{M}_{\mathbf{X}}\right]. \end{aligned}$$

Furthermore, we have can be expressed as

$$\begin{aligned} \sum_{i,j=1}^n w_{ij*}^2\ddot{b}(\eta_{i*})\ddot{b}(\eta_{j*}) &= \text{tr}[\mathbf{W}_*V_*\mathbf{W}_*V_*] = \text{tr}[(\mathbf{I}_{n(I)} - H_{*I})^{-1}H_{*I}(\mathbf{I}_{n(I)} - H_{*I})^{-1}H_{*I}] \\ &= \text{tr}[(\mathbf{I}_{n(I)} - H_{*I})^{-2}] - 2\text{tr}[(\mathbf{I}_{n(I)} - H_{*I})^{-1}] + n(I), \\ \sum_{i=1}^n w_{ii*}\ddot{b}(\eta_{i*}) &= \text{tr}[\mathbf{W}_*V_*] = \text{tr}[(\mathbf{I}_{n(I)} - H_{*I})^{-1}H_{*I}] = \text{tr}[(\mathbf{I}_{n(I)} - H_{*I})^{-1}] - n(I), \end{aligned}$$

which lead to (??). In addition, since  $H_*$  only has  $p$  non-zero eigenvalues and  $H_{*,I}$  is a submatrix of  $H_*$ , it follows from Wielandt's eigenvalue inequality that  $\lambda_{I,1} \geq \dots \geq \lambda_{I,p} \geq 0 = \lambda_{I,p+1} = \dots = \lambda_{I,n(I)}$  for  $n(I) \geq p$ . This yields Theorem S1 (b).

(c). Note that the matrices  $H_{*,I}$  and  $(\mathbf{X}_*^T\mathbf{X}_*)^{-1}\mathbf{X}_{*,I}^T\mathbf{X}_{*,I}$  have the same set of nonzero eigenvalues. Since  $n^{-1}\mathbf{X}_*^T\mathbf{X}_*$  and  $n(I)^{-1}\mathbf{X}_{*,I}^T\mathbf{X}_{*,I}$  converge to the same matrix

almost surely,  $n(I)n^{-1}[(n^{-1}\mathbf{X}_*^T\mathbf{X}_*)^{-1}n(I)^{-1}\mathbf{X}_{*,I}^T\mathbf{X}_{*,I} - \mathbf{I}_p]$  converges to  $\mathbf{0}$  almost surely as  $n, n(I) \rightarrow \infty$ . This completes the proof of Theorem S1 (c).

Theorem S1 (a) characterizes the stochastic behavior of  $\widetilde{\text{CD}}(I)$ , which depends on both the responses and the covariates in the set  $I$ . To ensure that  $E[\text{CD}(I)|\mathcal{M}]$  and  $Q_{\text{CD}(I)}(0.5|\mathcal{M})$  depend only on the size of the perturbation, not the set  $I$  itself, we need to bootstrap the randomness in both the responses and the covariates. Specifically, we can generate a new set of responses from the fitted model and draw an  $I_s$  at random from the original covariate data without (or with) replacement, where  $\text{size}(I_s) = \text{size}(I)$ . Then, we calculate the  $\text{CD}(I_s)$  based on the bootstrapped data for  $s = 1, \dots, S$  and use their sample median to approximate  $Q_{\text{CD}(I)}(0.5|\mathcal{M})$ . Theorem S1 (b) gives an approximation of  $E[\widetilde{\text{CD}}(I)|\mathcal{M}]$  and  $\text{Var}[\widetilde{\text{CD}}(I)|\mathcal{M}]$ . We can draw a sample of sets  $\{I_s : s = 1, \dots, S\}$  of size  $\text{size}(I)$  at random from the original covariate data without (or with) replacement and approximate them. Moreover, it should be noted that  $\sum_{j=1}^{n(I)} E[(1 - \lambda_{I,j})^{-1}|\mathcal{M}] - n(I)$  increases with the size of  $I$  even for  $n(I) \geq p$ . Theorem S1 (c) shows the asymptotic consistency of  $\lambda_{I,j}$  for  $j \leq p$ . As  $n(I)/n \rightarrow \gamma \in [0, 1)$ ,  $\sum_{j=1}^p E[(1 - \lambda_{I,j})^{-1}|\mathcal{M}] - p$  converges to  $p\gamma/(1 - \gamma)$ .

**Example S1 (continued).** For generalized linear models, we fix all covariates, that is  $\mathbf{Z} = \mathbf{X}$ , and then calculate the CSCDs as follows. First, we can show that

$$E[\widetilde{\text{CD}}(I)|\mathcal{M}, \mathbf{Z}] \approx \text{tr}[(\mathbf{I}_{n(I)} - H_{*,I})^{-1}] - n(I),$$

$$\text{Var}[\widetilde{\text{CD}}(I)|\mathcal{M}, \mathbf{Z}] \approx a(\tau_*) \sum_{i=1}^n w_{ii*} b^{(4)}(\eta_{i*}) + \text{tr}[(\mathbf{I}_{n(I)} - H_{*I})^{-1} H_{*I} (\mathbf{I}_{n(I)} - H_{*I})^{-1} H_{*I}].$$

Then, similar to the derivations of Theorem S1 (a) and (b), we can show that the conditionally scaled Cook's distance  $\text{CSCD}_1(I, \mathbf{X})$  can be approximated by

$$\frac{\hat{\mathbf{e}}^T \hat{\mathbf{V}}^{-1/2} U_I (\mathbf{I}_{n(I)} - \hat{H}_I)^{-1} \hat{H}_I (\mathbf{I}_{n(I)} - \hat{H}_I)^{-1} U_I^T \hat{\mathbf{V}}^{-1/2} \hat{\mathbf{e}} - [\sum_{j=1}^{n(I)} (1 - \lambda_{I,j})^{-1} - n(I)]}{\{a(\tau_*) \sum_{i=1}^n w_{ii*} b^{(4)}(\eta_{i*}) + \text{tr}[(\mathbf{I}_{n(I)} - H_{*I})^{-1} H_{*I} (\mathbf{I}_{n(I)} - H_{*I})^{-1} H_{*I}]\}^{1/2}}.$$

To approximate  $\text{CSCD}_2(I, \mathbf{X})$ , we can generate responses from the model fitted to the

data and then substitute them into Theorem S1 (a) to obtain a sample of simulated  $\widehat{\text{CD}}(I)$ 's given the covariates. Finally, we can use the empirical median and median standard deviation of the simulated  $\widehat{\text{CD}}(I)$ 's to approximate  $\text{CSCD}_2(I, \mathbf{Z})$ .

We consider the general linear model with correlated errors (LMCE).

**Example S2.** Consider the LMCE given by

$$\mathbf{Y} = \mathbf{X}\boldsymbol{\beta} + \boldsymbol{\epsilon}, \quad \boldsymbol{\epsilon} \sim N(\mathbf{0}, \sigma^2 \mathbf{R}). \quad (6)$$

By choosing various  $\mathbf{R}$ 's, LMCE includes the linear model with independent data, the multivariate linear model, time series models, geostatistical models, and mixed effects models as special cases (??). Similar to ?, we fix  $\mathbf{R}$  at an appropriate estimate  $\hat{\mathbf{R}}$  throughout the example. We can calculate the generalized least squares estimator

$$\hat{\boldsymbol{\beta}} = (\mathbf{X}^T \mathbf{R}^{-1} \mathbf{X})^{-1} \mathbf{X}^T \mathbf{R}^{-1} \mathbf{Y} = \mathbf{B} \mathbf{Y} \quad \text{and} \quad \hat{\sigma}^2 = \mathbf{Y}^T \mathbf{Q} \mathbf{Y} / (n - p) = \hat{\mathbf{e}}^T \mathbf{R}^{-1} \hat{\mathbf{e}} / (n - p),$$

where  $\mathbf{Q} = \mathbf{R}^{-1} - \mathbf{H}$ ,  $\hat{\mathbf{e}} = \mathbf{R} \mathbf{Q} \mathbf{Y}$ , and  $\mathbf{H} = \mathbf{R}^{-1} \mathbf{X} (\mathbf{X}^T \mathbf{R}^{-1} \mathbf{X})^{-1} \mathbf{X}^T \mathbf{R}^{-1}$ . Moreover, we have  $\text{var}(\hat{\boldsymbol{\beta}}) = \sigma^2 (\mathbf{X}^T \mathbf{R}^{-1} \mathbf{X})^{-1}$ . It has been shown in ? that Cook's distance for deleting the subset  $I$  is given by

$$\begin{aligned} \text{CD}(I) &= \frac{1}{\hat{\sigma}^2} \boldsymbol{\epsilon}^T \mathbf{Q} U_I \mathbf{Q}_{II}^{-1} (\mathbf{R}^{II} - \mathbf{Q}_{II}) \mathbf{Q}_{II}^{-1} U_I^T \mathbf{Q} \boldsymbol{\epsilon} \approx \\ \widehat{\text{CD}}(I) &= \frac{1}{\sigma^2} \boldsymbol{\epsilon}^T \mathbf{Q} U_I \mathbf{Q}_{II}^{-1} (\mathbf{R}^{II} - \mathbf{Q}_{II}) \mathbf{Q}_{II}^{-1} U_I^T \mathbf{Q} \boldsymbol{\epsilon}, \end{aligned} \quad (7)$$

where  $\mathbf{Q}_{II}$  is the  $(I, I)$  subset of  $\mathbf{Q}$  and  $\mathbf{R}^{II}$  is the  $(I, I)$  subset of  $\mathbf{R}^{-1}$ .

Since  $\widehat{\text{CD}}(I)$  is a quadratic form of  $\boldsymbol{\epsilon}$ , it follows from the well known results in (?) that

$$\begin{aligned} \text{E}[\text{CD}(I) | \mathcal{M}] &\approx \text{E}[\text{tr}(\mathbf{Q}_{II}^{-1} \mathbf{R}^{II}) | \mathcal{M}] - n(I) = \sum_{j=1}^{n(I)} \text{E}[(1 - \lambda_{I,j})^{-1} | \mathcal{M}] - n(I), \quad (8) \\ \text{Var}[\text{CD}(I) | \mathcal{M}] &\approx 2 \text{E}[\text{tr}\{[\mathbf{Q}_{II}^{-1} \mathbf{R}^{II} - \mathbf{I}_{n(I)}]^2\} | \mathcal{M}] + \text{Var}[\text{tr}(\mathbf{Q}_{II}^{-1} \mathbf{R}^{II}) | \mathcal{M}_X], \end{aligned}$$

where  $\mathcal{M}_X$  represents the distribution of  $\mathbf{X}$  and  $\lambda_{I,1} \geq \dots \geq \lambda_{I,n(I)}$  are the ordered eigenvalues of  $(\mathbf{R}^{II})^{-1/2} \mathbf{H}_{II} (\mathbf{R}^{II})^{-1/2}$ , in which  $\mathbf{H}_{II}$  is the  $(I, I)$  subset of  $\mathbf{H}$ . Therefore,

the scaled Cook's distance  $\text{SCD}_1(I)$  can be approximated by

$$\frac{\text{CD}(I) - \text{E}[\text{tr}(\mathbf{Q}_{II}^{-1}\mathbf{R}^{II})|\mathcal{M}] + n(I)}{\{2\text{E}(\text{tr}\{[\mathbf{Q}_{II}^{-1}\mathbf{R}^{II} - \mathbf{I}_{n(I)}]^2\}|\mathcal{M}) + \text{Var}[\text{tr}(\mathbf{Q}_{II}^{-1}\mathbf{R}^{II})|\mathcal{M}_X]\}^{1/2}}.$$

Similar to Theorem S1 (b), when  $n(I) \geq p$ , the right-hand side of (??) reduces to  $\sum_{j=1}^p E[(1 - \lambda_{I,j})^{-1}|\mathcal{M}] - p$ . In many scenarios such as the multivariate linear model, we can follow the strategies in Example S1 to approximate  $\text{E}[\text{CD}(I)|\mathcal{M}]$  and  $\text{Var}[\text{CD}(I)|\mathcal{M}]$ . However, for time series data, since the elements in  $\mathbf{X}$  are responses in an autoregressive model, such as the AR(1) model, we can use the parametric bootstrap to generate random samples from the fitted model and then approximate  $\text{E}[\text{CD}(I)|\mathcal{M}]$  and  $\text{Var}[\text{CD}(I)|\mathcal{M}]$ .

We calculate the conditionally scaled Cook's distances as  $\mathbf{Z} = \mathbf{X}$ . Since  $\widetilde{\text{CD}}(I)$  is a quadratic form of  $\boldsymbol{\epsilon}$ , it follows from the well known results in (?) that

$$\begin{aligned} \text{E}[\text{CD}(I)|\mathcal{M}, \mathbf{Z}] &\approx \text{tr}(\mathbf{Q}_{II}^{-1}\mathbf{R}^{II}) - n(I) = \sum_{j=1}^{n(I)} (1 - \lambda_{I,j})^{-1} - n(I), \\ \text{Var}[\text{CD}(I)|\mathcal{M}, \mathbf{Z}] &\approx 2\text{tr}\{[\mathbf{Q}_{II}^{-1}\mathbf{R}^{II} - \mathbf{I}_{n(I)}]^2\}. \end{aligned} \quad (9)$$

Thus, the conditionally scaled Cook's distance  $\text{CSCD}_1(I, \mathbf{Z})$  can be approximated by

$$\frac{\text{CD}(I) - \text{tr}(\mathbf{Q}_{II}^{-1}\mathbf{R}^{II}) + n(I)}{(2\text{tr}\{[\mathbf{Q}_{II}^{-1}\mathbf{R}^{II} - \mathbf{I}_{n(I)}]^2\})^{1/2}}.$$

## 2 Simulation Studies and A Real Data Example

In this section, we include an additional simulation study and some detailed results obtained from the simulated studies and the real data analysis in the paper.

### 2.1 Simulated Study I

The goals of our simulations were to evaluate the accuracy of the first-order approximations to Cook's distance and its associated quantities (e.g., mean) and to examine the

finite sample performance of Cook’s distance and the scaled Cook’s distances for detecting influential clusters in longitudinal data. We generated 100 datasets from a linear mixed model. Specifically, each dataset contains  $n$  clusters. For each cluster, the random effect  $b_i$  was first independently generated from a  $N(0, \sigma_b^2)$  distribution and then, given  $b_i$ , the observations  $y_{ij}$  ( $j = 1, \dots, m_i; i = 1, \dots, n$ ) were independently generated from a normal random generator such that  $y_{ij} \sim N(\mathbf{x}_{ij}^T \boldsymbol{\beta} + b_i, \sigma_y^2)$  and the  $m_i$  were randomly drawn from  $\{1, \dots, 10\}$ . The covariates  $\mathbf{x}_{ij}$  were set as  $(1, u_i, t_{ij})^T$ , among which  $t_{ij}$  represents time and  $u_i$  denotes a baseline covariate. Moreover,  $t_{ij} = \log(j)$  and the  $u_i$ ’s were independently generated from a  $N(0, 1)$  distribution. For all 100 datasets, both the responses and covariates were repeatedly generated, while the true value of  $(\boldsymbol{\beta}^T, \sigma_b, \sigma_y)$  was fixed at  $(1, 1, 1, 1, 1)$ . The sample size  $n$  was set at 30 to represent a relatively small sample size. We also explored other sample sizes and different degrees of correlation and obtained similar findings, and thus we did not report them here for the sake of space.

We carried out three experiments as follows. We treated  $(\sigma_b, \sigma_y)$  as nuisance parameters and  $\boldsymbol{\beta}$  as the parameter vector of interest. The first experiment was to evaluate the accuracy of  $\widetilde{\text{CD}}(I)$  to  $\text{CD}(I)$ . We considered two scenarios. In the first scenario, we directly used the simulated 100 datasets as the above linear mixed model. In the second scenario, for each simulated dataset, we deleted all the observations in clusters  $n - 1$  and  $n$  and then reset  $(m_{n-1}, b_{n-1}) = (1, 4)$  and  $(m_n, b_n) = (10, 3)$  to generate  $y_{i,j}$  for  $i = n - 1, n$  and all  $j$  according to the above random effects model. Thus, the new  $(n - 1)$ th and  $n$ th clusters can be regarded as influential clusters due to the extreme values of  $b_{n-1}$  and  $b_n$ . Moreover, the number of observations in these two clusters is extremely unbalanced.

For each dataset, we deleted each cluster one at a time and then calculated  $\text{CD}(I)$  and its first order approximation  $\widetilde{\text{CD}}(I)$  for each cluster. Moreover, we computed the



average  $\text{CD}(I)$ , and the biases and standard errors of the differences  $\text{CD}(I) - \widetilde{\text{CD}}(I)$  for each  $I$ . Table 1 shows some selected results for each scenario. The average  $\text{CD}(I)$ , is positively proportional to the cluster size  $n(I)$ . For the true ‘good’ clusters, the first-order approximation is very accurate and leads to small average biases and standard errors. Even for the influential clusters,  $\widetilde{\text{CD}}(I)$  is relatively close to  $\text{CD}(I)$ .

In the second experiment, we considered the same two scenarios as the first experiment in order to examine the finite sample performance of  $E[\text{CD}(I)|\mathcal{M}, \mathbf{Z}]$  and  $\text{Std}[\text{CD}(I)|\mathcal{M}, \mathbf{Z}]$  and their first-order approximations. Specifically, for each dataset, we set  $S = 100$  and simulated  $S = 100$  random samples from the fitted linear mixed model. Then, we approximated  $E[\text{CD}(I)|\mathcal{M}, \mathbf{Z}]$  and  $\text{Std}[\text{CD}(I)|\mathcal{M}, \mathbf{Z}]$  by using their empirical ones, and calculated their first approximations  $\widehat{M}[\widetilde{\text{CD}}(I)]$  and  $\widehat{\text{Std}}[\widetilde{\text{CD}}(I)]$ .

Across all 100 data sets, for each cluster  $I$ , we computed the averages of  $E[\text{CD}(I)|\mathcal{M}, \mathbf{Z}]$  and  $\text{Std}[\text{CD}(I)|\mathcal{M}, \mathbf{Z}]$ , and the biases and standard errors of the differences  $E[\text{CD}(I)|\mathcal{M}, \mathbf{Z}] - \widehat{M}[\widetilde{\text{CD}}(I)]$  and  $\text{Std}[\text{CD}(I)|\mathcal{M}, \mathbf{Z}] - \widehat{\text{Std}}[\widetilde{\text{CD}}(I)]$ . Table 1 shows some selected results for each scenario. The averages of  $E[\text{CD}(I)|\mathcal{M}, \mathbf{Z}]$  and  $\text{Std}[\text{CD}(I)|\mathcal{M}, \mathbf{Z}]$  are positively proportional to the cluster size  $n(I)$ . For the true ‘good’ clusters, the first-order approximations of  $E[\text{CD}(I)|\mathcal{M}, \mathbf{Z}]$  and  $\text{Std}[\text{CD}(I)|\mathcal{M}, \mathbf{Z}]$  are very accurate and lead to small average biases and standard errors, while for the influential clusters, their first-order approximations are relatively accurate.

The third experiment was to examine the finite sample performance of Cook’s distance and the scaled Cook’s distances for detecting influential cluster in longitudinal data. We considered two scenarios. In the first scenario, for each of the 100 simulated datasets, we deleted all the observations in cluster  $n$  and then reset  $m_n = 1$  and varied  $b_n$  from 0.4 to 8.0 to generate  $y_{n,1}$  according to the above random effects model. The second scenario is almost the same as the first scenario except that we reset  $m_n = 10$ .

Table 1: Selected results from simulation studies for  $n = 30$  and the two scenarios:  $n(I)$ , M, SD, Mdif ( $\times 10^{-2}$ ), and SDdif ( $\times 10^{-1}$ ) of the three quantities  $CD(I)$ ,  $E[CD(I)|\mathcal{M}, \mathbf{Z}]$ , and  $\text{Std}[CD(I)|\mathcal{M}, \mathbf{Z}]$ .  $n(I)$  denotes the cluster size of subset  $I$ ; M denotes the mean; SD denotes the standard deviation; Mdif and SDdif, respectively, denote the mean and standard deviation of the differences between each quantity and its first-order approximation. In the first scenario, all observations were generated from the linear mixed model, while in the second scenario, clusters 29 and 30 were influential clusters. For each case, 100 simulated datasets were used.

|     |        | CD(I)                                       |       |        |       |           |              |              |               |              |  |
|-----|--------|---------------------------------------------|-------|--------|-------|-----------|--------------|--------------|---------------|--------------|--|
|     |        | Scenario I                                  |       |        |       |           | Scenario II  |              |               |              |  |
| $I$ | $n(I)$ | M                                           | SD    | Mdif   | SDdif | $n(I)$    | M            | SD           | Mdif          | SDdif        |  |
| 1   | 4      | 0.133                                       | 0.237 | 0.345  | 0.186 | 4         | 0.087        | 0.142        | 0.055         | 0.054        |  |
| 5   | 9      | 0.162                                       | 0.163 | 0.001  | 0.125 | 9         | 0.140        | 0.139        | 0.019         | 0.074        |  |
| 10  | 8      | 0.159                                       | 0.220 | 0.124  | 0.107 | 8         | 0.138        | 0.186        | -0.0003       | 0.106        |  |
| 15  | 1      | 0.036                                       | 0.048 | 0.022  | 0.010 | 1         | 0.033        | 0.041        | 0.018         | 0.010        |  |
| 20  | 8      | 0.156                                       | 0.213 | 0.271  | 0.019 | 8         | 0.120        | 0.130        | 0.085         | 0.069        |  |
| 25  | 9      | 0.164                                       | 0.166 | -0.027 | 0.102 | 9         | 0.143        | 0.149        | -0.111        | 0.084        |  |
| 29  | 1      | 0.041                                       | 0.081 | 0.020  | 0.010 | <b>1</b>  | <b>0.343</b> | <b>0.309</b> | <b>0.555</b>  | <b>0.181</b> |  |
| 30  | 10     | 0.159                                       | 0.203 | 0.151  | 0.082 | <b>10</b> | <b>0.508</b> | <b>0.505</b> | <b>3.245</b>  | <b>0.571</b> |  |
|     |        | $E[CD(I) \mathcal{M}, \mathbf{Z}]$          |       |        |       |           |              |              |               |              |  |
|     |        | Scenario I                                  |       |        |       |           | Scenario II  |              |               |              |  |
| $I$ | $n(I)$ | M                                           | SD    | Mdif   | SDdif | $n(I)$    | M            | SD           | Mdif          | SDdif        |  |
| 1   | 4      | 0.083                                       | 0.057 | 0.016  | 0.010 | 4         | 0.070        | 0.048        | 0.030         | 0.008        |  |
| 5   | 9      | 0.165                                       | 0.066 | 0.211  | 0.031 | 9         | 0.159        | 0.068        | 0.170         | 0.022        |  |
| 10  | 8      | 0.137                                       | 0.056 | 0.106  | 0.018 | 8         | 0.140        | 0.078        | 0.113         | 0.019        |  |
| 15  | 1      | 0.050                                       | 0.059 | -0.144 | 0.030 | 1         | 0.055        | 0.051        | -0.116        | 0.026        |  |
| 20  | 8      | 0.141                                       | 0.056 | 0.118  | 0.022 | 8         | 0.130        | 0.062        | 0.089         | 0.015        |  |
| 25  | 9      | 0.174                                       | 0.086 | 0.194  | 0.027 | 9         | 0.177        | 0.081        | 0.170         | 0.025        |  |
| 29  | 3      | 0.067                                       | 0.055 | 0.003  | 0.010 | <b>1</b>  | <b>0.056</b> | <b>0.045</b> | <b>-0.129</b> | <b>0.048</b> |  |
| 30  | 7      | 0.119                                       | 0.055 | 0.117  | 0.016 | <b>10</b> | <b>0.197</b> | <b>0.065</b> | <b>0.192</b>  | <b>0.028</b> |  |
|     |        | $\text{Std}[CD(I) \mathcal{M}, \mathbf{Z}]$ |       |        |       |           |              |              |               |              |  |
|     |        | Scenario I                                  |       |        |       |           | Scenario II  |              |               |              |  |
| $I$ | $n(I)$ | M                                           | SD    | Mdif   | SDdif | $n(I)$    | M            | SD           | Mdif          | SDdif        |  |
| 1   | 4      | 0.107                                       | 0.084 | 0.114  | 0.036 | 4         | 0.088        | 0.063        | 0.096         | 0.034        |  |
| 5   | 9      | 0.174                                       | 0.076 | 0.218  | 0.068 | 9         | 0.163        | 0.072        | 0.017         | 0.063        |  |
| 10  | 8      | 0.142                                       | 0.066 | 0.036  | 0.052 | 8         | 0.149        | 0.099        | 0.114         | 0.059        |  |
| 15  | 1      | 0.075                                       | 0.103 | 0.147  | 0.063 | 1         | 0.080        | 0.075        | 0.211         | 0.061        |  |
| 20  | 8      | 0.145                                       | 0.069 | 0.076  | 0.073 | 8         | 0.135        | 0.081        | 0.010         | 0.047        |  |
| 25  | 9      | 0.177                                       | 0.099 | 0.046  | 0.069 | 9         | 0.185        | 0.097        | 0.039         | 0.060        |  |
| 29  | 3      | 0.090                                       | 0.085 | 0.174  | 0.077 | <b>1</b>  | <b>0.082</b> | <b>0.065</b> | <b>0.251</b>  | <b>0.089</b> |  |
| 30  | 7      | 0.128                                       | 0.070 | 0.132  | 0.062 | <b>10</b> | <b>0.205</b> | <b>0.068</b> | <b>0.077</b>  | <b>0.063</b> |  |

For each dataset, we deleted each cluster one at a time and calculated  $CD(I)$ . Then, we computed  $P_C(I, \mathbf{Z}) = \sum_{I \neq \{n\}} \mathbf{1}(CD(I) \leq CD(\{n\})) / (n - 1)$ , which characterizes the probability that  $CD(\{n\})$  is greater than all the other  $CD(I)$ . We set  $S = 100$  and then we approximated  $CSCD_1(I, \mathbf{Z})$ ,  $CSCD_2(I, \mathbf{Z})$ ,  $\widetilde{CSCD}_1(I, \mathbf{Z})$ , and  $\widetilde{CSCD}_2(I, \mathbf{Z})$ . Subsequently, we calculated  $P_A(I, \mathbf{Z})$  and  $P_B(I, \mathbf{Z})$  based on  $\widetilde{CSCD}_1(I, \mathbf{Z})$  and  $\widetilde{CSCD}_2(I, \mathbf{Z})$ .

Finally, across all 100 datasets, we calculated the averages and standard errors of all diagnostic measures for the  $n$ th cluster for each scenario. Figures S1 and S2 present some selected results. Comparing the two scenarios, we observed that deleting the  $n$ -th cluster with 10 observations causes larger effect than that with 1 observation (Fig S1 (a) and Fig S2 (a)). For the first scenario,  $CD(\{n\})$  is relatively smaller than the other  $CD(I)$  (Fig. S1 (d)), whereas for the second scenario,  $CD(\{n\})$  is relatively larger than other  $CD(I)$  (Fig. S2 (d)). Furthermore, in the two scenarios,  $P_A(\{n\}, \mathbf{Z})$  and  $P_B(\{n\}, \mathbf{Z})$  for the scaled Cook's distances increase with  $b_n$  as expected, while they are quite close to each other across all values of  $b_n$  (Fig. S1 (d) and Fig. S2 (d)). It may indicate that all scaled Cook's distances are consistent with each other.

## 2.2 Simulation Study II

We included some detailed results for the first two experiments of the simulation studies in the paper. The first experiment was to evaluate the accuracy of  $\widetilde{CD}(I)$  to  $CD(I)$ . The explicit expression of  $\widetilde{CD}(I)$  is given in Example S2 of the supplementary document. We considered two scenarios. In the first scenario, we directly simulated 100 datasets from the above linear mixed model. In the second scenario, for each simulated dataset, we deleted all the observations in clusters 1 and  $n$  and then reset  $(m_1, b_1) = (1, 4)$  and  $(m_n, b_n) = (5, 3)$  to generate  $y_{i,j}$  for  $i = 1, n$  and all  $j$  according to the above linear mixed model. Thus, the new first and  $n$ th clusters can be regarded as influential clusters due

to the extreme values of  $b_1$  and  $b_n$ . Moreover, the number of observations in these two clusters is unbalanced.

For each dataset, we deleted each cluster one at a time and then calculated  $\text{CD}(I)$  and its first-order approximation  $\widetilde{\text{CD}}(I)$  for each cluster. Moreover, we computed the average  $\text{CD}(I)$ , and the biases and standard errors of the differences  $\text{CD}(I) - \widetilde{\text{CD}}(I)$  for each cluster. When no influential cluster is present in the first scenario, the distribution of  $\text{CD}(I)$  shifts up as  $\mathcal{P}(I|\mathcal{M})$  increases (Fig. 3(a)). This result indicates that Assumption A1 may be reasonable. In the second scenario, the distribution of  $\text{CD}(I)$  for the true ‘good’ clusters shifts up as  $\mathcal{P}(I|\mathcal{M})$  increases, while that for the two influential clusters are associated with both  $\mathcal{P}(I|\mathcal{M})$  and the amount of influence that we introduced (Fig. 4 (a)).

For the true ‘good’ clusters, the first-order approximation is very accurate and leads to relatively small average biases and standard errors (Figs. 3 (d) and 4 (d)). Moreover, the degree of accuracy decreases as  $\mathcal{P}(I|\mathcal{M})$  increases (Figs. 3 (d) and 4 (d)). Even for the influential clusters,  $\widetilde{\text{CD}}(I)$  is relatively close to  $\text{CD}(I)$  (Fig. 4 (d)). Specifically, the bias of  $\widetilde{\text{CD}}(I)$  relative to  $\text{CD}(I)$  equals 0.01 for cluster  $\{1\}$  and 0.19 for cluster  $\{n\}$ . Even for cluster  $\{n\}$ , the bias of 0.19 is relatively small compared with 0.78, the mean of  $\text{CD}(\{n\})$ . Moreover, such bias may be negligible for diagnostic purposes.

In the second experiment, we considered the same two scenarios as the first experiment in order to examine the finite sample performance of  $E[\text{CD}(I)|\mathcal{M}, \mathbf{Z}]$  and  $\text{Std}[\text{CD}(I)|\mathcal{M}, \mathbf{Z}]$  and their first-order approximations. Specifically, for each dataset, we set  $S = 200$  and simulated  $S = 200$  random samples from the fitted linear mixed model. Then, we approximated  $E[\text{CD}(I)|\mathcal{M}, \mathbf{Z}]$  and  $\text{Std}[\text{CD}(I)|\mathcal{M}, \mathbf{Z}]$  by using their empirical ones, and calculated their first approximations  $\widehat{M}[\widetilde{\text{CD}}(I)]$  and  $\widehat{\text{Std}}[\widetilde{\text{CD}}(I)]$ .

In both scenarios, the distribution of  $E[\text{CD}(I)|\mathcal{M}, \mathbf{Z}]$  shifts up as  $\mathcal{P}(I|\mathcal{M})$  increases

(Fig. 3 (b) and Fig. 4(b)). This is in agreement with the results of Proposition 1. For all clusters, the first-order approximations of  $E[\text{CD}(I)|\mathcal{M}, \mathbf{Z}]$  and  $\text{Std}[\text{CD}(I)|\mathcal{M}, \mathbf{Z}]$  are very accurate and lead to small average biases and standard errors (Fig. 3 (e) and (f), Fig. 4 (e) and (f)). Moreover, the degree of accuracy decreases as  $\mathcal{P}(I|\mathcal{M})$  increases (Figs. 3 (d) and 4 (d)).

Table 2 presents the degrees of perturbation and the means and standard deviations of four conditionally scaled Cook’s distances including  $\text{CSCD}_1(I, \mathbf{Z})$  and  $\text{CSCD}_2(I, \mathbf{Z})$  and their first-order approximations for all 12 clusters. In both scenarios, the four CSCDs are weakly associated with  $\mathcal{P}(I|\mathcal{M})$ . Figure 5 presents the box plots of the four CSCDs under the two scenarios. Inspecting Figure 5 (a)-(d) does not reveal any obvious relationship between the distributions of the four CSCDs and the degree of perturbation in the first scenario. Moreover, in the second scenario, we did not observe obvious relationship between the distributions of the four CSCDs and the degree of perturbation for these ‘good’ clusters. We also observed from Figure 5 (e)-(h) that for the two influential clusters, the distributions of the four CSCDs are associated with the influence level that we introduced.

### 2.3 Yale Infant Growth Data

Under each model, we calculated  $\text{CD}(I)$  for each child, which relates more to the detection of influential clusters (?). We treated  $\beta$  as parameters of interest and all elements of  $\alpha$  as nuisance parameters. For models  $M_1$  and  $M_2$ , inspecting Figures 6 (a) and 7 (a) reveals that  $\mathcal{P}(I|\mathcal{M})$  is positively associated with  $m_i$ . This indicates that the bigger the cluster size, the larger the degree of perturbation.

Under model  $M_1$ , we used  $\text{CD}(I)$  to select the top five influential subjects 269, 217, 294, 289, and 274 (Fig. 6 (b)), while we used  $\text{CSCD}_1(I)$  to select the top eight influential subjects

Table 2: The two conditionally scaled Cook’s distances of  $\text{CSCD}_1(I)$  and  $\text{CSCD}_2(I)$  and their first-order approximations  $\widetilde{\text{CSCD}}_1(I)$  and  $\widetilde{\text{CSCD}}_2(I)$  from simulation studies for  $n = 12$  and the two scenarios: M denotes the mean; and SD denotes the standard deviation. In the first scenario, all observations were generated from the linear mixed model, while in the second scenario, two influential clusters were highlighted in bold. For each case, 100 simulated datasets were used. Results were sorted according to the degree of perturbation.

| $\mathcal{P}(I \mathcal{M})$ | Scenario I         |              |                    |              |                                |              |                                |              |
|------------------------------|--------------------|--------------|--------------------|--------------|--------------------------------|--------------|--------------------------------|--------------|
|                              | $\text{CSCD}_1(I)$ |              | $\text{CSCD}_2(I)$ |              | $\widetilde{\text{CSCD}}_1(I)$ |              | $\widetilde{\text{CSCD}}_2(I)$ |              |
|                              | M                  | SD           | M                  | SD           | M                              | SD           | M                              | SD           |
| 0.102                        | -0.016             | 0.739        | 1.457              | 2.854        | -0.008                         | 0.789        | 1.366                          | 2.746        |
| 0.108                        | 0.039              | 0.862        | 0.976              | 2.160        | 0.032                          | 0.844        | 0.838                          | 1.977        |
| 0.110                        | 0.178              | 1.078        | 1.599              | 3.058        | 0.151                          | 1.010        | 1.305                          | 2.429        |
| 0.128                        | 0.123              | 1.098        | 1.436              | 3.356        | 0.102                          | 1.120        | 1.237                          | 2.990        |
| 0.147                        | 0.351              | 1.264        | 2.210              | 3.946        | 0.364                          | 1.315        | 2.076                          | 3.806        |
| 0.159                        | 0.019              | 0.928        | 0.854              | 2.384        | -0.001                         | 0.921        | 0.732                          | 2.088        |
| 0.188                        | 0.237              | 1.037        | 1.956              | 3.532        | 0.240                          | 1.119        | 1.798                          | 3.478        |
| 0.224                        | 0.109              | 0.832        | 1.227              | 2.376        | 0.118                          | 0.875        | 1.084                          | 2.215        |
| 0.264                        | 0.128              | 0.974        | 1.138              | 2.580        | 0.114                          | 0.922        | 1.077                          | 2.272        |
| 0.403                        | 0.301              | 1.390        | 1.407              | 3.153        | 0.297                          | 1.339        | 1.408                          | 3.008        |
| 0.569                        | 0.151              | 1.023        | 1.568              | 3.308        | 0.131                          | 0.971        | 1.566                          | 3.244        |
| 0.599                        | 0.346              | 1.583        | 1.808              | 3.862        | 0.312                          | 1.380        | 1.920                          | 3.825        |
| $\mathcal{P}(I \mathcal{M})$ | Scenario II        |              |                    |              |                                |              |                                |              |
|                              | M                  | SD           | M                  | SD           | M                              | SD           | M                              | SD           |
|                              | M                  | SD           | M                  | SD           | M                              | SD           | M                              | SD           |
| <b>0.079</b>                 | <b>2.486</b>       | <b>1.477</b> | <b>9.654</b>       | <b>5.280</b> | <b>2.583</b>                   | <b>1.489</b> | <b>9.721</b>                   | <b>5.215</b> |
| 0.109                        | -0.186             | 0.724        | 0.455              | 2.015        | -0.175                         | 0.783        | 0.412                          | 1.969        |
| 0.114                        | -0.116             | 0.674        | 0.992              | 2.345        | -0.116                         | 0.705        | 0.934                          | 2.305        |
| 0.131                        | -0.294             | 0.544        | 0.166              | 1.541        | -0.293                         | 0.583        | 0.157                          | 1.577        |
| 0.155                        | -0.273             | 0.553        | 0.304              | 1.689        | -0.285                         | 0.571        | 0.234                          | 1.653        |
| 0.199                        | -0.284             | 0.540        | 0.190              | 1.522        | -0.288                         | 0.565        | 0.142                          | 1.514        |
| 0.226                        | -0.222             | 0.619        | 0.278              | 1.497        | -0.243                         | 0.630        | 0.224                          | 1.465        |
| 0.245                        | -0.134             | 0.824        | 0.328              | 1.741        | -0.106                         | 0.883        | 0.380                          | 1.764        |
| <b>0.279</b>                 | <b>1.061</b>       | <b>1.695</b> | <b>3.516</b>       | <b>4.620</b> | <b>0.644</b>                   | <b>0.962</b> | <b>2.234</b>                   | <b>2.189</b> |
| 0.368                        | -0.096             | 0.773        | 0.475              | 1.738        | -0.072                         | 0.841        | 0.520                          | 1.817        |
| 0.534                        | -0.176             | 0.862        | 0.408              | 2.098        | -0.148                         | 0.847        | 0.505                          | 2.186        |
| 0.555                        | -0.275             | 0.608        | 0.309              | 2.018        | -0.261                         | 0.619        | 0.353                          | 2.064        |

274, 90, 217, 109, 294, 289, 246, and 149 (Fig. 6 (c)). Although we observed some difference between  $CD(I)$  and  $CSCD_1(I)$  in detecting highly influential subjects, the value of  $CD(I)$  and that of  $CSCD_1(I)$  are positively correlated with each other across all subjects (Figure 6 (d)). Moreover, Table 3 presents the top twelve influential subjects detected by  $CD(I)$ ,  $CSCD_1(I|\mathcal{M}, \mathbf{Z})$ , and  $CSCD_2(I|\mathcal{M}, \mathbf{Z})$ . We used  $P_B(I, \mathbf{Z})$  to quantify whether a specific subject is influential relative to the fitted model for all subjects (Figure 6 (e)). Inspecting Figure 6 (f) reveals that there are large number of influential subjects, and thus it may indicate the potential model misspecification in model  $\mathcal{M}_1$ .

Under model  $M_2$ , we used  $CD(I)$  to select the top five influential subjects 269, 285, 280, 246, and 58 (Fig. 7 (b)), while we used  $CSCD_1(I)$  to select the top eight influential subjects 246, 141, 109, 31, and 193 (Fig. 7 (c)). Although we observed some difference between  $CD(I)$  and  $CSCD_1(I)$  in detecting highly influential subjects, the value of  $CD(I)$  and that of  $CSCD_1(I)$  are positively correlated with each other across all subjects (Figure 7 (d)). We used  $P_B(I, \mathbf{Z})$  to quantify whether a specific subject is influential relative to the fitted model for all subjects (Figure 7 (e)). Inspecting Figure 7 (f) reveals that the number of influential subjects has dramatically reduced, and thus it may indicate that model  $M_2$  outperforms model  $M_1$  in fitting the Yale infant growth data.

Table 3: *Yale infant growth data*. Top 12 influential subjects for single case deletion with the compound symmetry model.

| ID         | $m_i$    | CD           | ID         | $m_i$    | CSCD <sub>1</sub> | $P_B(I, \mathbf{Z})$ | ID         | $m_i$    | CSCD <sub>2</sub> | $P_B(I, \mathbf{Z})$ |
|------------|----------|--------------|------------|----------|-------------------|----------------------|------------|----------|-------------------|----------------------|
| 269        | 12       | 2.416        | 274        | 22       | 43.593            | 1.000                | 217        | 19       | 62.639            | 1.000                |
| 217        | 19       | 1.465        | 217        | 19       | 27.359            | 1.000                | 274        | 22       | 60.809            | 1.000                |
| 294        | 13       | 1.252        | 90         | 17       | 27.273            | 1.000                | 90         | 17       | 51.969            | 1.000                |
| 289        | 18       | 1.188        | 109        | 12       | 25.520            | 1.000                | 109        | 12       | 48.173            | 1.000                |
| 274        | 22       | 1.163        | 289        | 18       | 24.610            | 1.000                | 294        | 13       | 45.117            | 1.000                |
| 90         | 17       | 0.858        | 294        | 13       | 23.950            | 1.000                | 149        | 17       | 43.843            | 1.000                |
| 38         | 24       | 0.823        | 149        | 17       | 22.217            | 1.000                | 38         | 24       | 40.753            | 1.000                |
| <b>285</b> | <b>8</b> | <b>0.738</b> | <b>246</b> | <b>5</b> | <b>21.443</b>     | <b>1.000</b>         | 289        | 18       | 36.529            | 1.000                |
| 280        | 9        | 0.695        | 38         | 24       | 16.508            | 1.000                | <b>246</b> | <b>5</b> | <b>35.626</b>     | <b>1.000</b>         |
| 149        | 17       | 0.668        | 62         | 13       | 16.455            | 1.000                | 269        | 12       | 33.447            | 1.000                |
| 109        | 12       | 0.625        | 269        | 12       | 16.172            | 1.000                | 280        | 9        | 25.034            | 1.000                |
| 224        | 22       | 0.591        | 280        | 9        | 15.098            | 1.000                | 62         | 13       | 24.483            | 1.000                |

Note that  $m_i$  represents cluster size and  $P_B(I, \mathbf{Z})$  is computed by equation (??) .



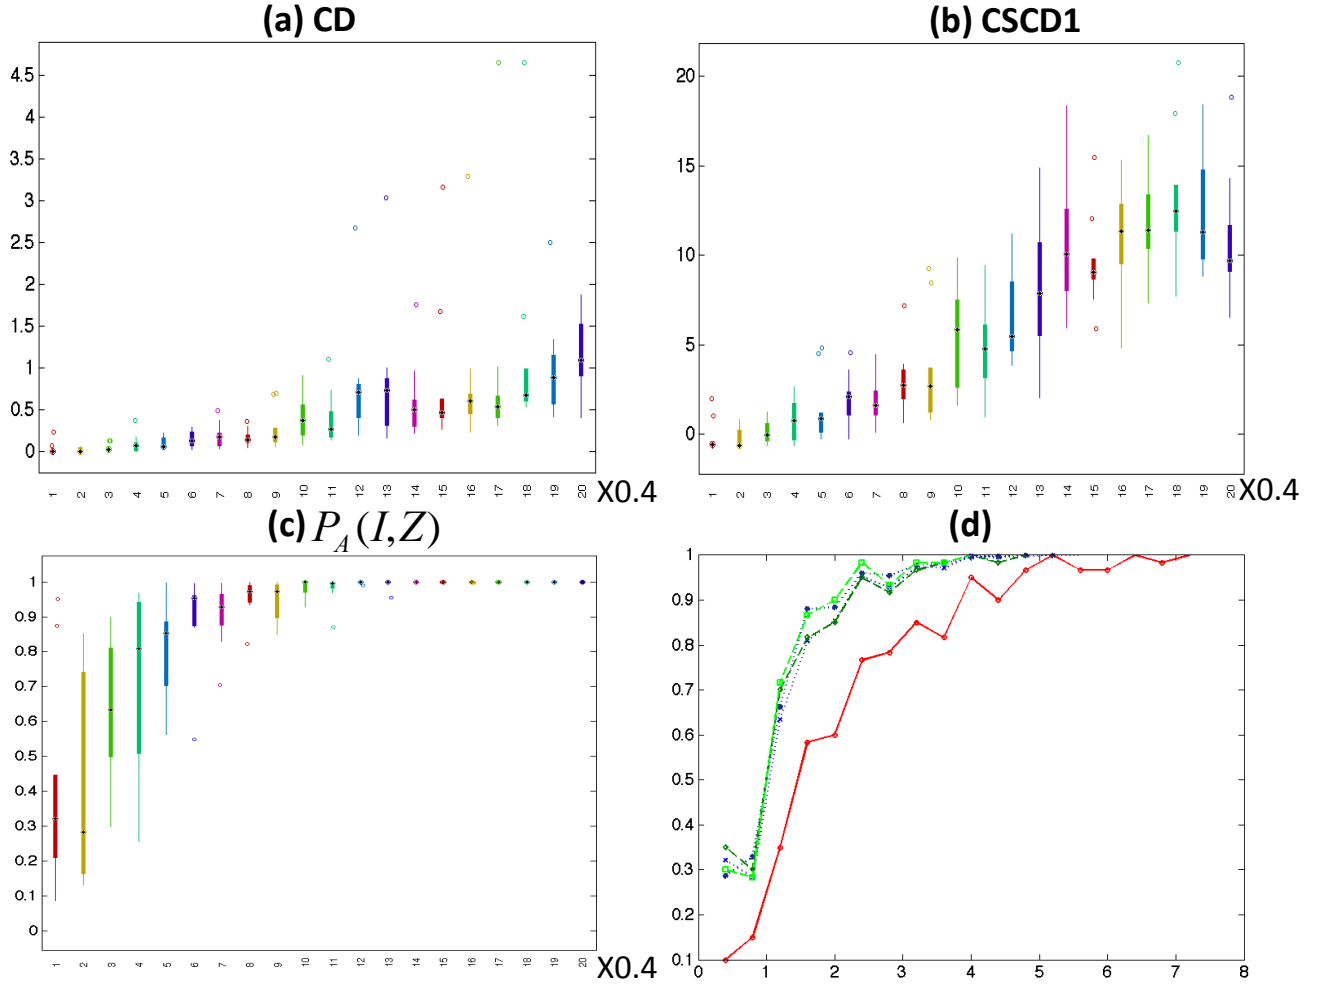

Figure 1: Results from 100 datasets simulated from a linear mixed model, in which  $m_{30} = 1$  and  $b_{30}$  varies from 0.4 to 8.0. Panel (a) shows the box plots of Cook's distances as a function of  $b_{30}$ ; panel (b) shows the box plots of  $CSCD_1(I, \mathbf{Z})$  as a function of  $b_{30}$ ; panel (c) shows the box plots of  $P_A(I, \mathbf{Z})$  as a function of  $b_{30}$ ; panel (d) shows the mean curves of  $P_A(I, \mathbf{Z})$  based on the four scaled Cook's distances, in which the green line is for  $CSCD_1(I, \mathbf{Z})$ , the dark green line is for  $CSCD_2(I, \mathbf{Z})$ , the blue line is for  $CSCD_1(I, \mathbf{Z})$ , and the dark line is for  $CSCD_1(I, \mathbf{Z})$ , and the mean curve of  $P_C(I, \mathbf{Z})$  based on  $CD(I)$  (red line) as functions of  $b_{30}$ .

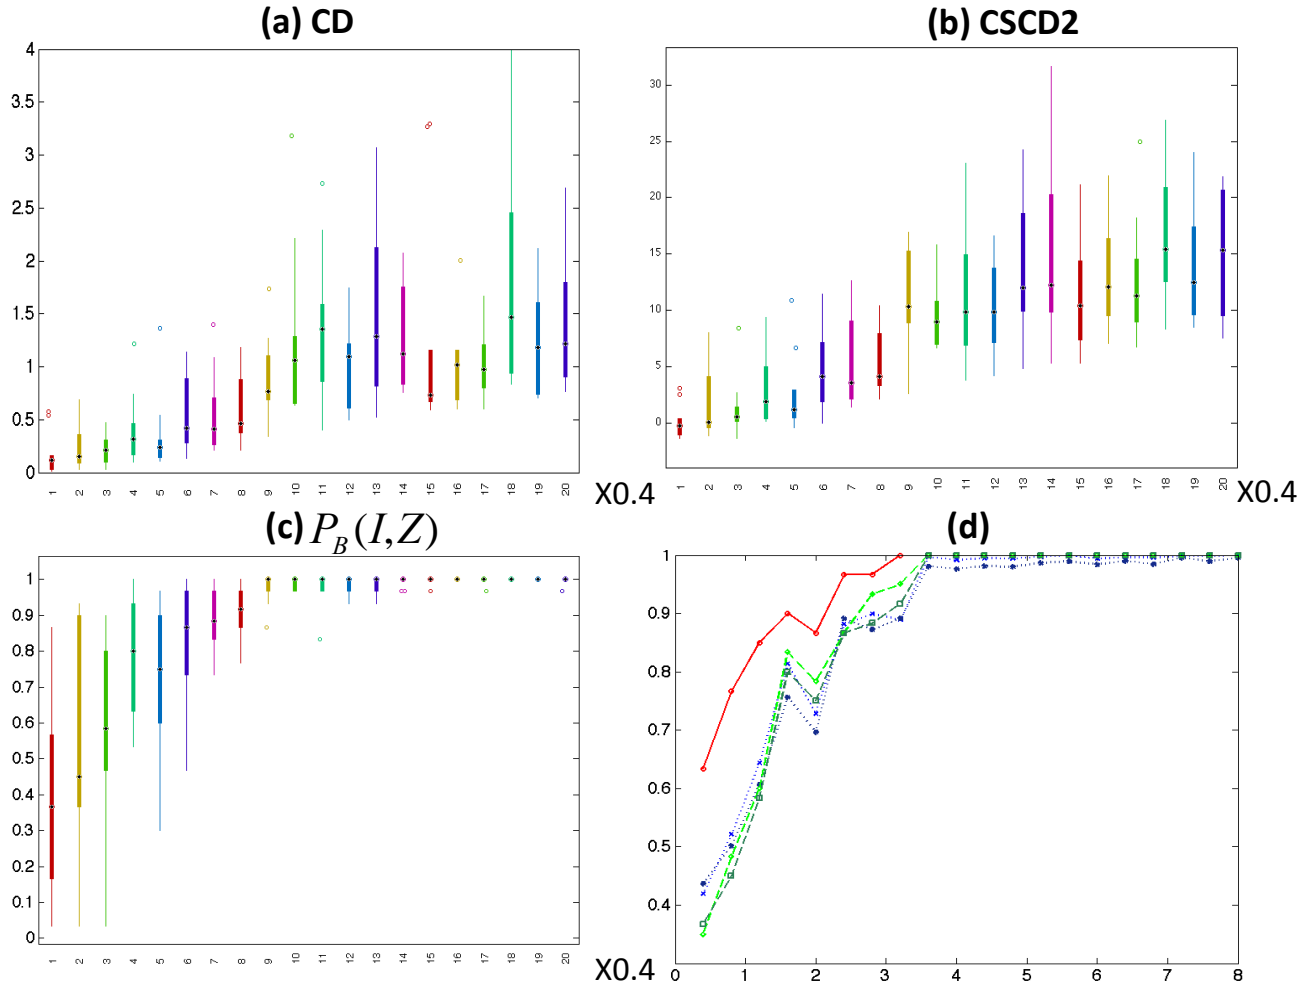

Figure 2: Results from 100 datasets simulated from a linear mixed model, in which  $m_{30} = 1$  and  $b_{30}$  varies from 0.4 to 8.0. Panel (a) shows the box plots of Cook's distances as a function of  $b_{30}$ ; panel (b) shows the box plots of  $CSCD_1(I, \mathbf{Z})$  as a function of  $b_{30}$ ; panel (c) shows the box plots of  $P_B(I, \mathbf{Z})$  as a function of  $b_{30}$ ; panel (d) shows the mean curves of  $P_B(I, \mathbf{Z})$  based on the four scaled Cook's distances, in which the green line is for  $CSCD_1(I, \mathbf{Z})$ , the dark green line is for  $CSCD_2(I, \mathbf{Z})$ , the blue line is for  $CSCD_1(I, \mathbf{Z})$ , and the dark line is for  $CSCD_1(I, \mathbf{Z})$ , and the mean curve of  $P_C(I, \mathbf{Z})$  based on  $CD(I)$  (red line) as functions of  $b_{30}$ .

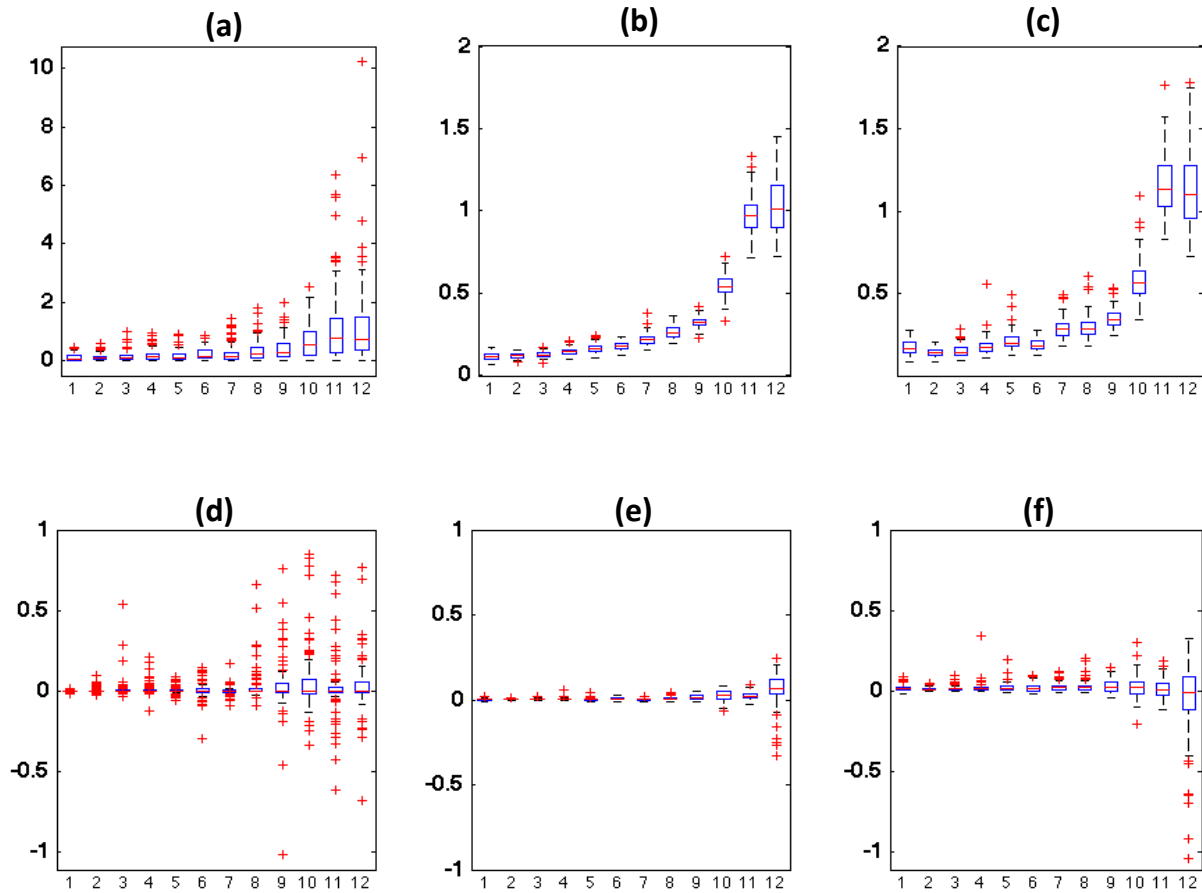

Figure 3: Simulation results from 100 datasets without influential clusters directly simulated from a linear mixed model. The  $x$ -axis corresponds to the order of the sorted degree of perturbation for all clusters. Panels (a), (b), and (c) show the box plots of  $CD(I)$ ,  $E[CD(I)|\mathcal{M}, \mathbf{Z}]$ , and  $Std[CD(I)|\mathcal{M}, \mathbf{Z}]$  as a function of  $\mathcal{P}(I|M)$ ; panels (d), (e), and (f) show the box plots of  $CD(I) - \widehat{CD}(I)$ ,  $E[CD(I)|\mathcal{M}, \mathbf{Z}] - \widehat{M}[CD(I)]$ , and  $Std[CD(I)|\mathcal{M}, \mathbf{Z}] - \widehat{Std}[CD(I)]$  as a function of  $\mathcal{P}(I|M)$ .

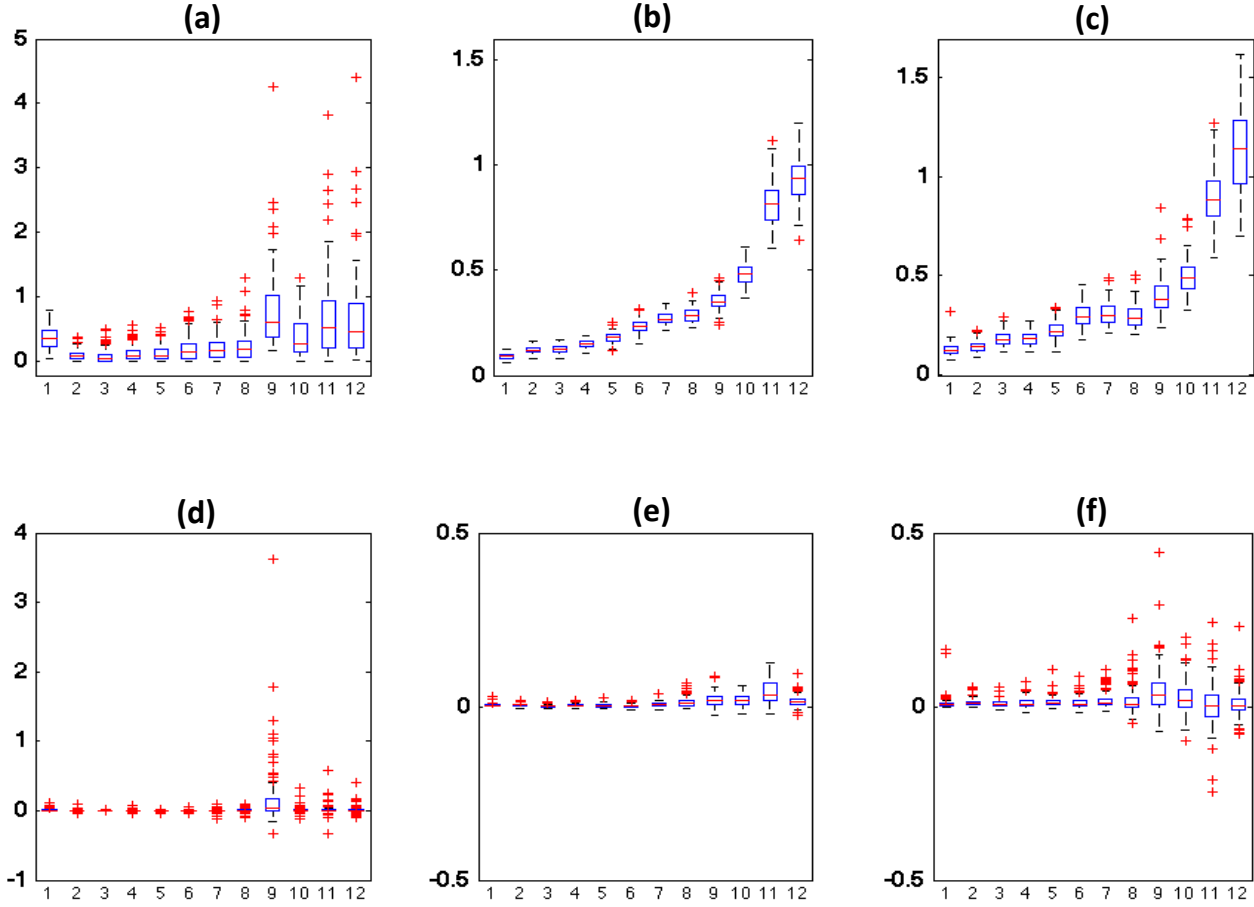

Figure 4: Simulation results from 100 datasets with two influential clusters simulated from a linear mixed model, in which we reset  $(m_1, b_1) = (1, 4)$  and  $(m_n, b_n) = (5, 3)$  to generate  $y_{i,j}$  for  $i = 1, n$  and all  $j$  according to the same linear mixed model. The  $x$ -axis corresponds to the order of the sorted degree of perturbation for all clusters. Panels (a), (b), and (c) show the box plots of  $CD(I)$ ,  $E[CD(I)|\mathcal{M}, \mathbf{Z}]$ , and  $Std[CD(I)|\mathcal{M}, \mathbf{Z}]$  as a function of  $\mathcal{P}(I|M)$ ; panels (d), (e), and (f) show the box plots of  $CD(I) - \widetilde{CD}(I)$ ,  $E[CD(I)|\mathcal{M}, \mathbf{Z}] - \widehat{M}[\widetilde{CD}(I)]$ , and  $Std[CD(I)|\mathcal{M}, \mathbf{Z}] - \widehat{Std}[\widetilde{CD}(I)]$  as a function of  $\mathcal{P}(I|M)$ .

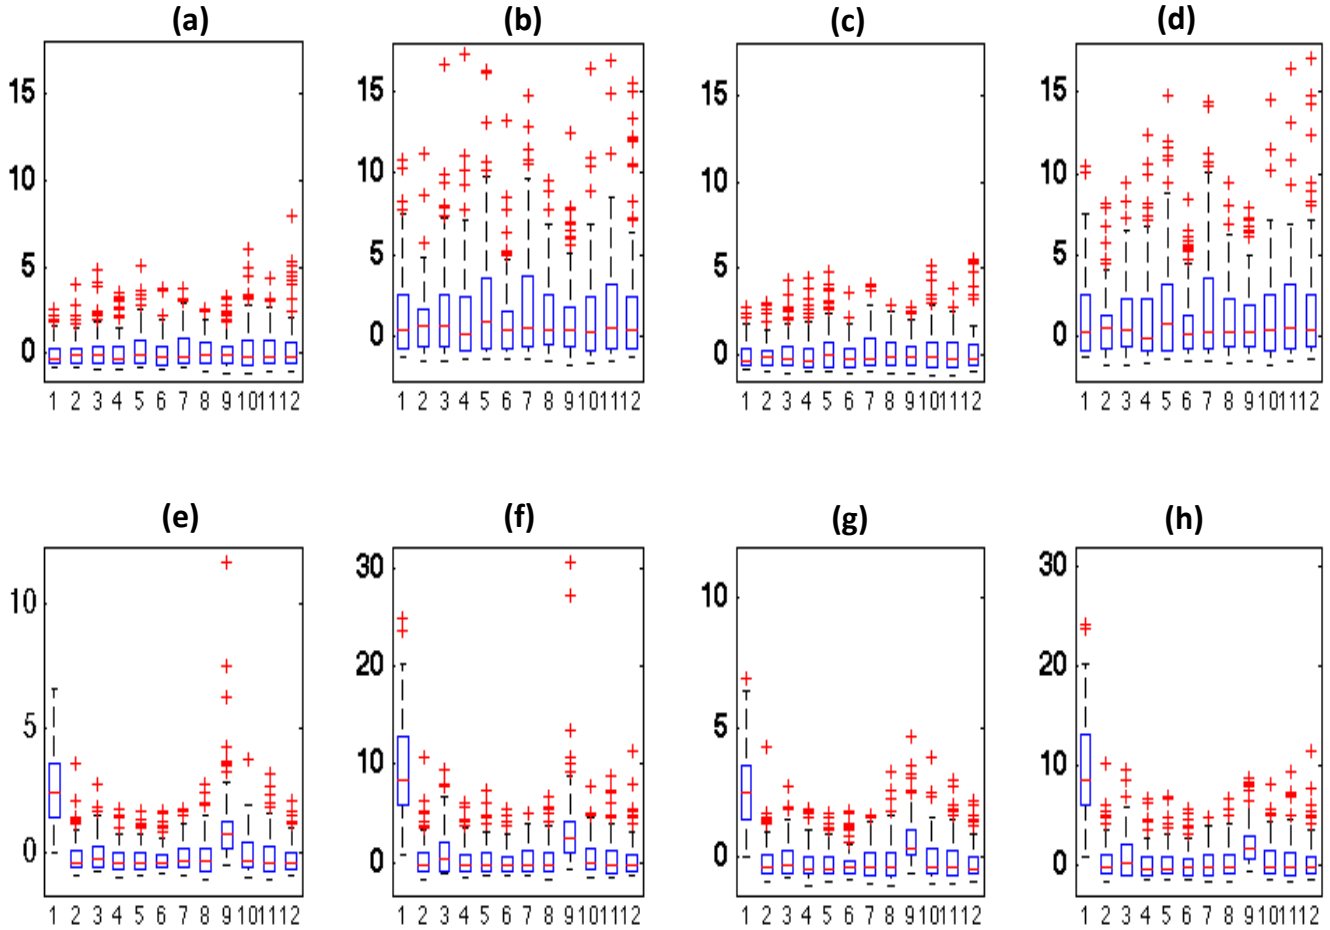

Figure 5: Simulation results from 100 datasets simulated from a linear mixed model in the two scenarios. The first row corresponds to the first scenario with no influential subjects. The second row corresponds to the second scenario, in which we set  $(m_1, b_1) = (1, 4)$  and  $(m_{12}, b_{12}) = (5, 3)$ . The  $x$ -axis corresponds to the order of the sorted degrees of perturbation. For the second scenario, the 1st and 9th cases are, respectively, the two influential subjects with  $(m_1, b_1) = (1, 4)$  and  $(m_{12}, b_{12}) = (5, 3)$ . Panels (a) and (e) show the box plots of  $\text{CSCD}_1(I, \mathbf{Z})$  as a function of  $\mathcal{P}(I|\mathcal{M})$ ; panels (b) and (f) show the box plots of  $\text{CSCD}_2(I, \mathbf{Z})$  as a function of  $\mathcal{P}(I|\mathcal{M})$ ; panels (c) and (g) show the box plots of  $\widetilde{\text{CSCD}}_1(I, \mathbf{Z})$  as a function of  $\mathcal{P}(I|\mathcal{M})$ ; panels (d) and (h) show the box plots of  $\widetilde{\text{CSCD}}_2(I, \mathbf{Z})$  as a function of  $\mathcal{P}(I|\mathcal{M})$ .

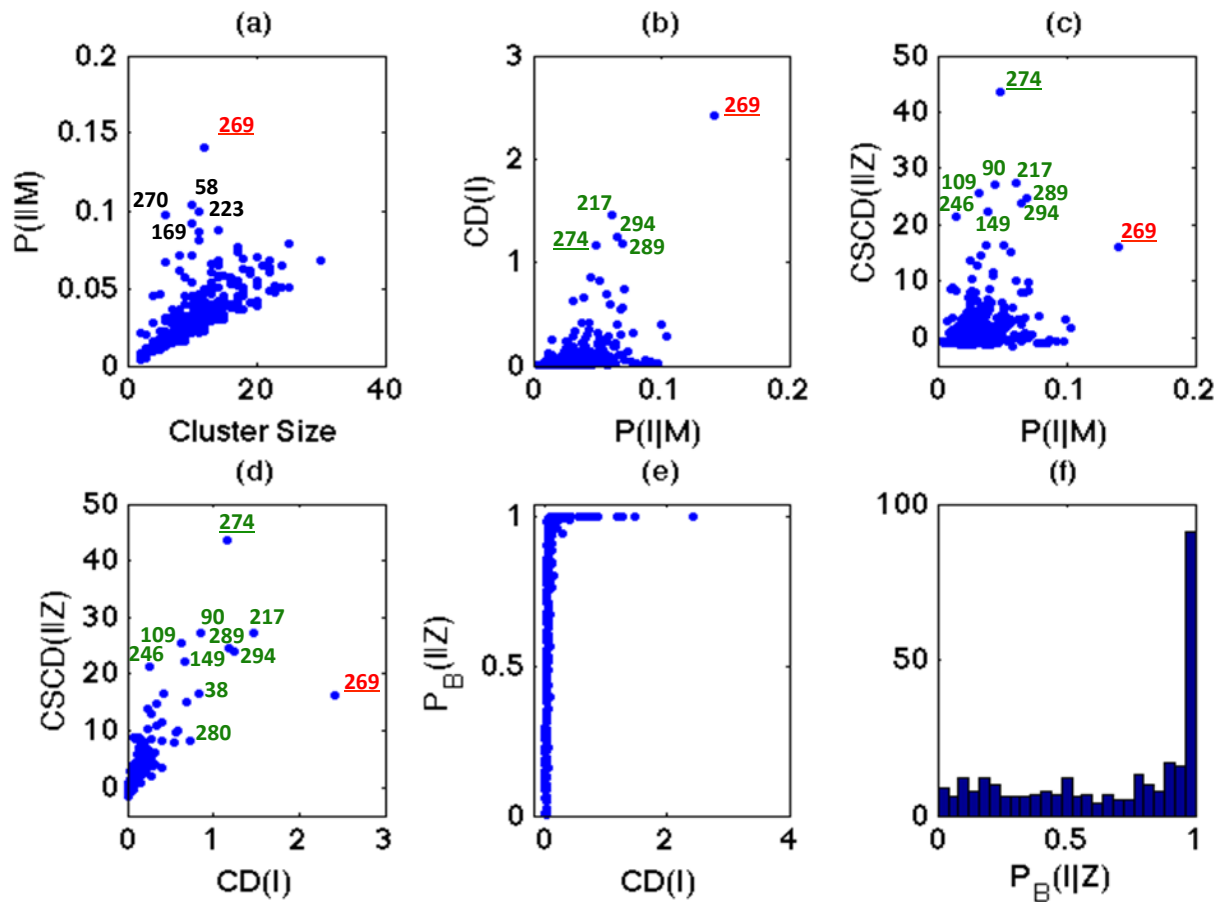

Figure 6: Yale infant growth data analysis based on model  $\mathcal{M}_1$ . Panel (a) shows  $\mathcal{P}(I|M)$  versus  $m_i$ ; panels (b), (c), (d), and (e), respectively, present  $CD(I)$  versus  $\mathcal{P}(I|M)$ ,  $CSCD(I|Z)$  versus  $\mathcal{P}(I|M)$ ,  $CSCD(I|Z)$  versus  $CD(I)$ , and  $P_B(I|Z)$  versus  $CD(I)$ ; panel (f) presents the histogram of  $P_B(I|Z)$ .

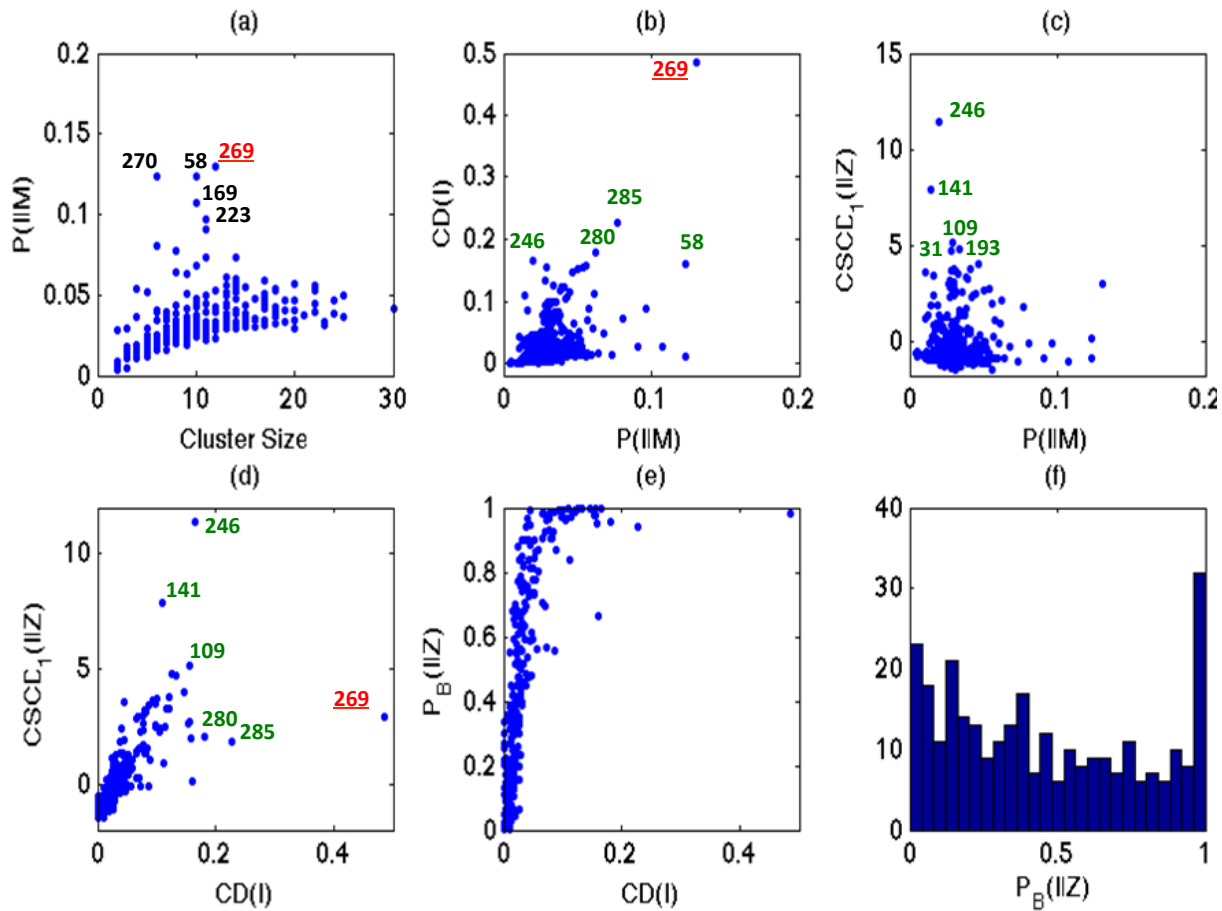

Figure 7: Yale infant growth data analysis based on model  $\mathcal{M}_2$ . Panel (a) shows  $\mathcal{P}(I|M)$  versus  $m_i$ ; panels (b), (c), (d), and (e), respectively, present  $CD(I)$  versus  $\mathcal{P}(I|M)$ ,  $CSCD(I|Z)$  versus  $\mathcal{P}(I|M)$ ,  $CSCD(I|Z)$  versus  $CD(I)$ , and  $P_B(I|Z)$  versus  $CD(I)$ ; panel (f) presents the histogram of  $P_B(I|Z)$ .
